# Supplementary material for: The dynamics of stem and crown groups
Source: PubMed Central journal article supplement — Sci Adv. 2020 Feb 19;6(8):eaaz1626. doi: 10.1126/sciadv.aaz1626 (PMC7030935; doi:10.1126/sciadv.aaz1626), 2020-02-19
Supplement: aaz1626_SM.pdf [file aaz1626_SM.pdf]

[advances.sciencemag.org/cgi/content/full/6/8/eaaz1626/DC1](https://advances.sciencemag.org/cgi/content/full/6/8/eaaz1626/DC1)

## Supplementary Materials for

### **The dynamics of stem and crown groups**

Graham E. Budd\* and Richard P. Mann

\*Corresponding author. Email: [graham.budd@pal.uu.se](mailto:graham.budd@pal.uu.se)

Published 19 February 2020, *Sci. Adv.* **6**, eaaz1626 (2020)  
DOI: [10.1126/sciadv.aaz1626](https://doi.org/10.1126/sciadv.aaz1626)

**Other Supplementary Material for this manuscript includes the following:**

(available at [advances.sciencemag.org/cgi/content/full/6/8/eaaz1626/DC1](https://advances.sciencemag.org/cgi/content/full/6/8/eaaz1626/DC1))

Data file S1 (.R format). R code used for generating Figs. 2 and 3.
